# Supplementary material for: Nontrivial role of polar optical phonons in limiting electron mobility of two-dimensional Ga2O3 from first-principles
Source: Royal Society of Chemistry journal article supplement (doi:10.1039/d3cp00036b), 2023-01-01
Supplement: d3cp00036b1.pdf [file d3cp00036b1.pdf]

Supplementary Information for

# Nontrivial role of polar optical phonons in limiting electron mobility of two-dimensional Ga<sub>2</sub>O<sub>3</sub> from first-principles

Xinlei Duan,<sup>a,b</sup> Tianyu Wang,<sup>c</sup> Zhiwei Fu,<sup>a,d</sup> Linhua Liu,<sup>a,b\*</sup> and Jia-Yue Yang<sup>a,b\*</sup>

<sup>a</sup> School of Energy and Power Engineering, Shandong University, Jinan, Shandong 250061, China

<sup>b</sup> Optics & Thermal Radiation Research Center, Institute of Frontier and Interdisciplinary, Shandong University,  
Qingdao, 266237, China

<sup>c</sup> School of Energy and Power Engineering, Huazhong University of Science and Technology, Wuhan, 430074, China

<sup>d</sup> Science and Technology on Reliability Physics and Application of Electronic Component Laboratory, China Electronic Product Reliability and Environmental Testing Research Institute, Guangzhou 510610, China

<sup>c</sup> School of Energy and Power Engineering, Huazhong University of Science and Technology, Wuhan, 430074, China

<sup>d</sup> Science and Technology on Reliability Physics and Application of Electronic Component Laboratory, China Electronic Product Reliability and Environmental Testing Research Institute, Guangzhou 510610, China

## S. RESULTS AND DISCUSSIONS

---

\* Author to whom correspondence should be addressed. E-Mail: [jy\\_yang@sdu.edu.cn](mailto:jy_yang@sdu.edu.cn) (J.Y.),  
[liulinhua@sdu.edu.cn](mailto:liulinhua@sdu.edu.cn) (L.L.)

**Table.S1. The matrix of elastic constants for bulk and 2D Ga<sub>2</sub>O<sub>3</sub> (in GPa)**

|                                     |                   | $C_{11}$ | $C_{12}$ | $C_{13}$ | $C_{15}$ | $C_{22}$ | $C_{23}$ | $C_{25}$ | $C_{33}$ | $C_{35}$ | $C_{44}$ | $C_{46}$ | $C_{55}$ | $C_{66}$ |
|-------------------------------------|-------------------|----------|----------|----------|----------|----------|----------|----------|----------|----------|----------|----------|----------|----------|
| Bulk Ga <sub>2</sub> O <sub>3</sub> | Cal.              | 222.9    | 119.6    | 139.4    | -17.1    | 338.8    | 81.4     | 9.8      | 326.6    | 7.3      | 54.6     | 19.8     | 61.4     | 87.3     |
|                                     | Cal. <sup>1</sup> | 220.5    | 116.4    | 128.3    | -17.3    | 329.5    | 79.0     | 11.4     | 326.8    | 7.2      | 50.0     | 18.1     | 66.1     | 91.5     |
|                                     | Exp. <sup>2</sup> | 242.8    | 128.0    | 160.0    | -1.6     | 343.8    | 70.9     | 0.4      | 347.4    | 1.0      | 47.8     | 5.6      | 88.6     | 104.0    |
| ML Ga <sub>2</sub> O <sub>3</sub>   | Cal.              | 0.24     | 0.63     | 6.56     | 0.15     | 127.7    | 0.87     | 0.61     | 87.02    | 2.89     | 4.61     | 1.21     | 0.45     | 0.44     |
|                                     | Cal. <sup>3</sup> | 1.57     | 0.33     | 9.80     | 0.42     | 124.78   | 0.21     | 0.21     | 79.61    | 0.40     | 1.72     | 0.15     | 0.06     | 0.34     |
| BL Ga <sub>2</sub> O <sub>3</sub>   | Cal.              | 19.47    | 0.64     | 0.67     | 0.01     | 193.39   | 0.45     | 0.98     | 159.18   | 0.56     | 24.02    | 0.34     | 1.09     | 1.35     |
|                                     | Cal. <sup>3</sup> | 17.57    | 1.05     | 7.20     | 1.39     | 187.38   | 4.43     | 1.35     | 134.77   | 1.18     | 24.37    | 0.67     | 0.97     | 2.63     |

## References

- 1 K. Lion, P. Pavone and C. Draxl, *Phys. Rev. Mater.*, 2022, **6**, 013601.
- 2 K. Adachi, H. Ogi, N. Takeuchi, N. Nakamura, H. Watanabe, T. Ito and Y. Ozaki, *J. Appl. Phys.*, 2018, **124**, 085102.
- 3 J. Su, J. Zhang, R. Guo, Z. Lin, M. Liu, J. Zhang, J. Chang and Y. Hao, *Materials & Design*, 2019, **184**, 108197.
